# Supplementary material for: Ultrasound-propelled nanomotors for efficient cancer cell ferroptosis
Source: Royal Society of Chemistry journal article supplement (doi:10.1039/d3tb02041j), 2023-12-08
Supplement: d3tb02041j1.pdf [file d3tb02041j1.pdf]

## Support Information

# Ultrasound-Propelled Nanorobots for Efficient Cancer Cell Ferroptosis

Ting Chen<sup>a,b</sup>, Jie Yang<sup>a</sup>, He Zhao<sup>a</sup>, Dajian Li<sup>a</sup>, Xiaoyong Luo<sup>a</sup>, Zhiyu Fan<sup>a</sup>, Biye Ren<sup>b\*</sup>, Yuepeng Cai<sup>a\*</sup>, Renfeng Dong<sup>a\*</sup>

*a School of Chemistry, South China Normal University, Guangzhou 510006, China*

*b School of Materials Science and Engineering, South China University of Technology, Guangzhou 510640, China*

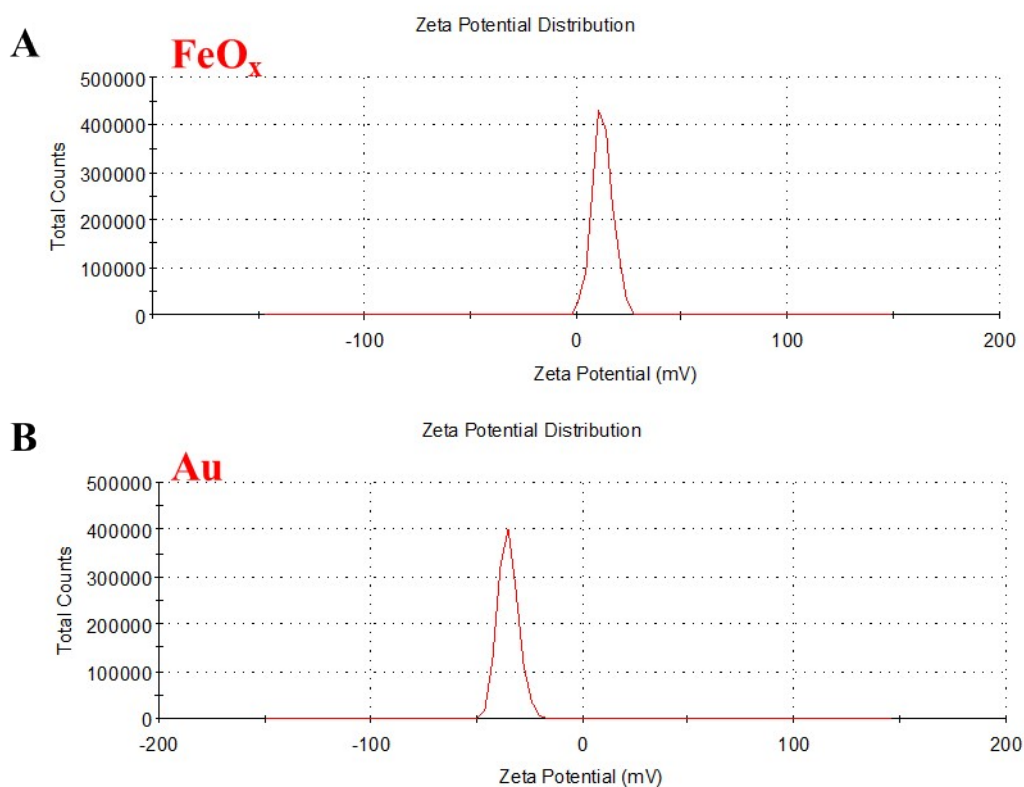

**Fig. S1** Zeta potential data of (A) FeO<sub>x</sub> and (B) Au.

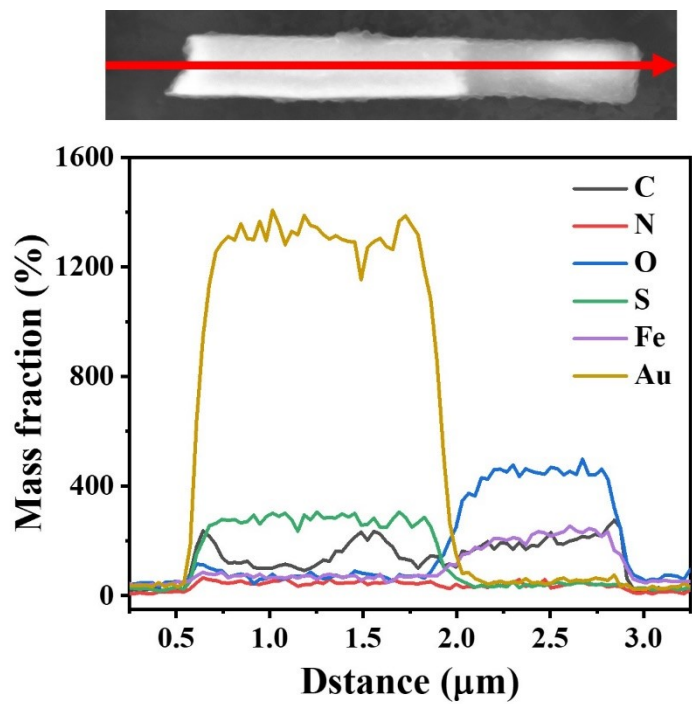

Fig. S2 Linear scanning distribution of elements on nanomotors.

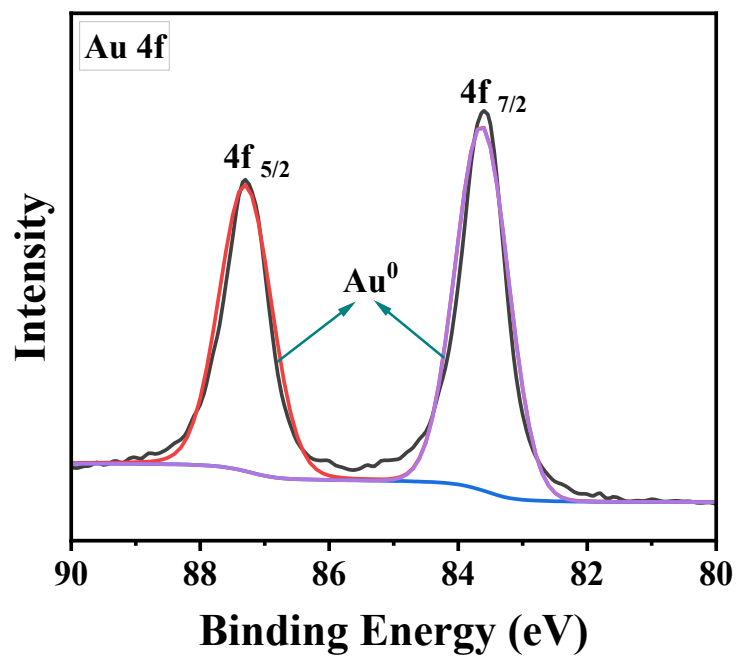

Fig. S3 XPS spectra of Au 4f peaks in AFPI NMs.

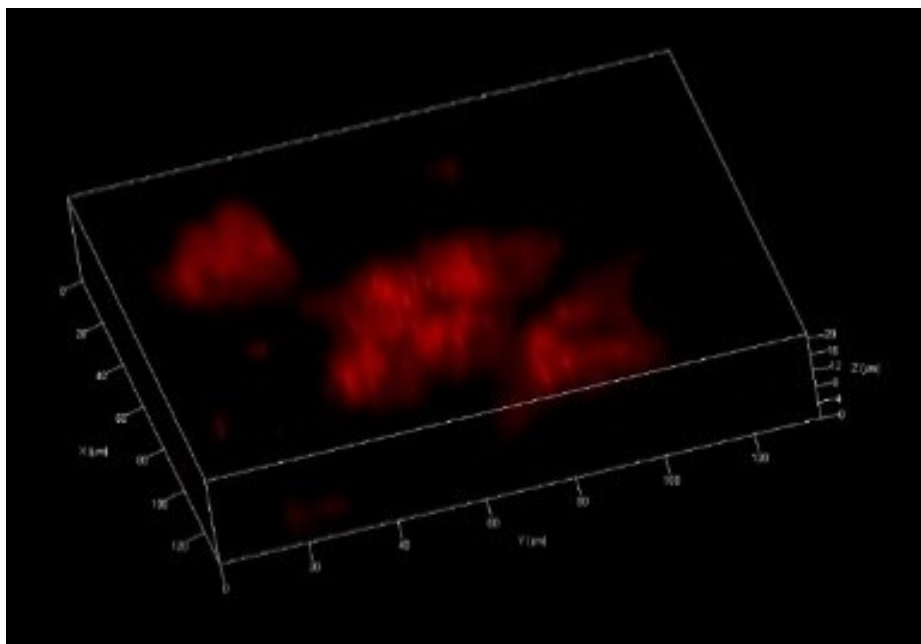

**Fig. S4** Z-stacked scanning CLSM image of MCF-7 cells cultured with AFPI NMs under a US field and incubation for 12 h. The scanned height was 21  $\mu\text{m}$  and the z-spacing was 3  $\mu\text{m}$ .

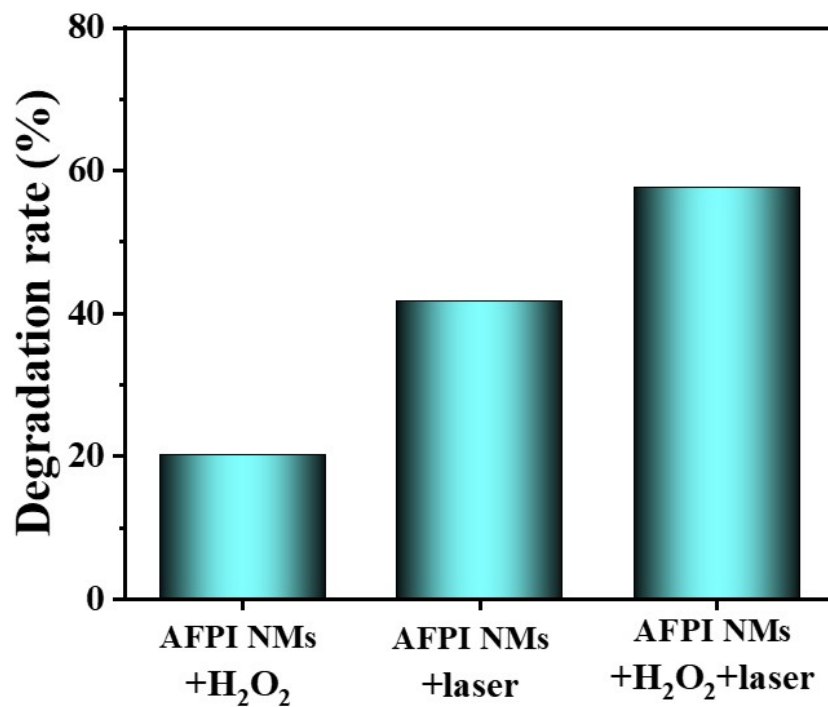

**Fig. S5** The histogram of degradation rate of DPBF after different treatments.

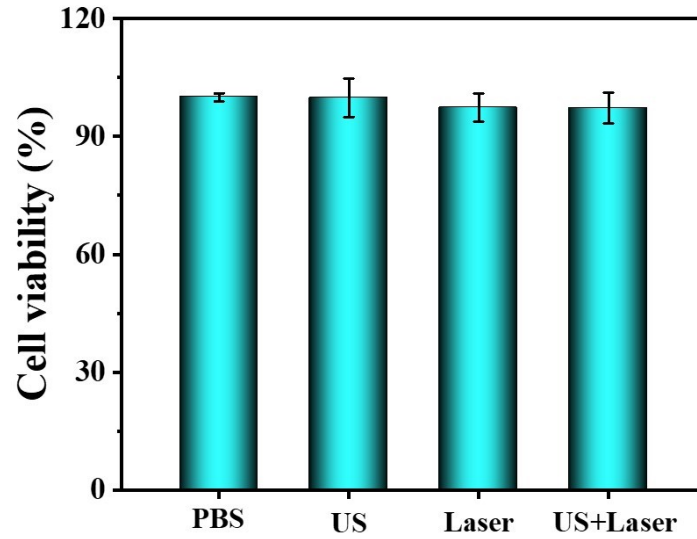

**Fig. S6** Viability of MCF-7 cells treated with different methods for 24 h.

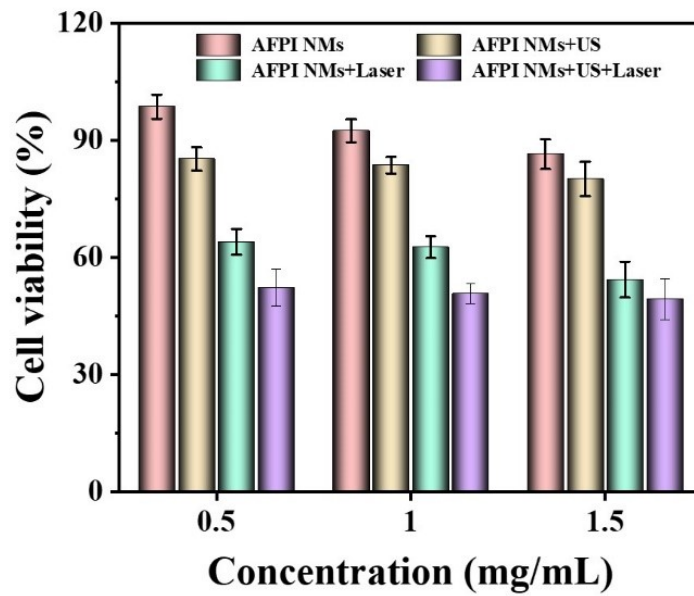

**Fig. S7** Viability of HL-7702 cells treated with different methods for 24 h.

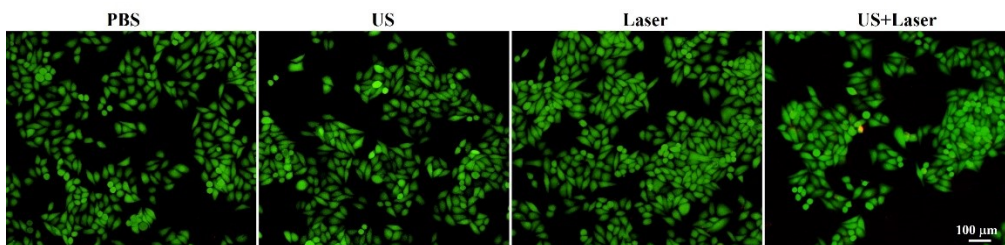

**Fig. S8** Fluorescence images of live-dead staining in MCF-7 cells treated with different methods for 24 h.
